# Supplementary material for: Targeting of PI3K/AKT/mTOR pathway to inhibit T cell activation and prevent graft-versus-host disease development
Source: Springer Nature journal article supplement (doi:10.1186/s13045-016-0343-5), 2016-10-20

## Supplementary Information

**Figure S1. Effect of BKM120 and BEZ235 on the percentage of central memory, effector memory and effector/TEMRA T cells.** Percentage of central memory, effector memory and effector/TEMRA cells among CD4<sup>+</sup> and CD8<sup>+</sup> cells unstimulated or stimulated in the presence of different concentrations of BKM120 or BEZ235. Mean ± SEM of five different experiments. # p<0.05 with respect to stimulated untreated samples (0 μM).

**Figure S2. Effect of BKM120 and BEZ235 on the phenotype of different CD4<sup>+</sup> T cell maturation subsets.** Percentage of cells expressing CD25, IFN-γ and granzyme B among different CD4<sup>+</sup> T cell maturation subsets, in samples unstimulated or stimulated in the presence of different concentrations of BKM120 or BEZ235. Mean +SD of five different experiments. # p<0.05 with respect to stimulated untreated samples (0 μM).

**Figure S3. Effect of BKM120 and BEZ235 on the phenotype of different CD8<sup>+</sup> T cell maturation subsets.** Percentage of cells expressing CD25, IFN-γ and granzyme B among different CD8<sup>+</sup> T cell maturation subsets, in samples unstimulated or stimulated in the presence of different concentrations of BKM120 or BEZ235. Mean +SD of five different experiments. # p<0.05 with respect to stimulated untreated samples (0 μM).

**Figure S4. Effect of BKM120 and BEZ235 on granzyme B expression by effector/TEMRA T cells.** Median Fluorescence Intensity (MFI) of granzyme B among effector/TEMRA CD4<sup>+</sup> and CD8<sup>+</sup> T cells unstimulated or stimulated in the presence of different concentrations of BKM120 or BEZ235. Mean +SD of four different experiments. # p<0.05 with respect to stimulated untreated samples (0 μM).

**Figure S1.**

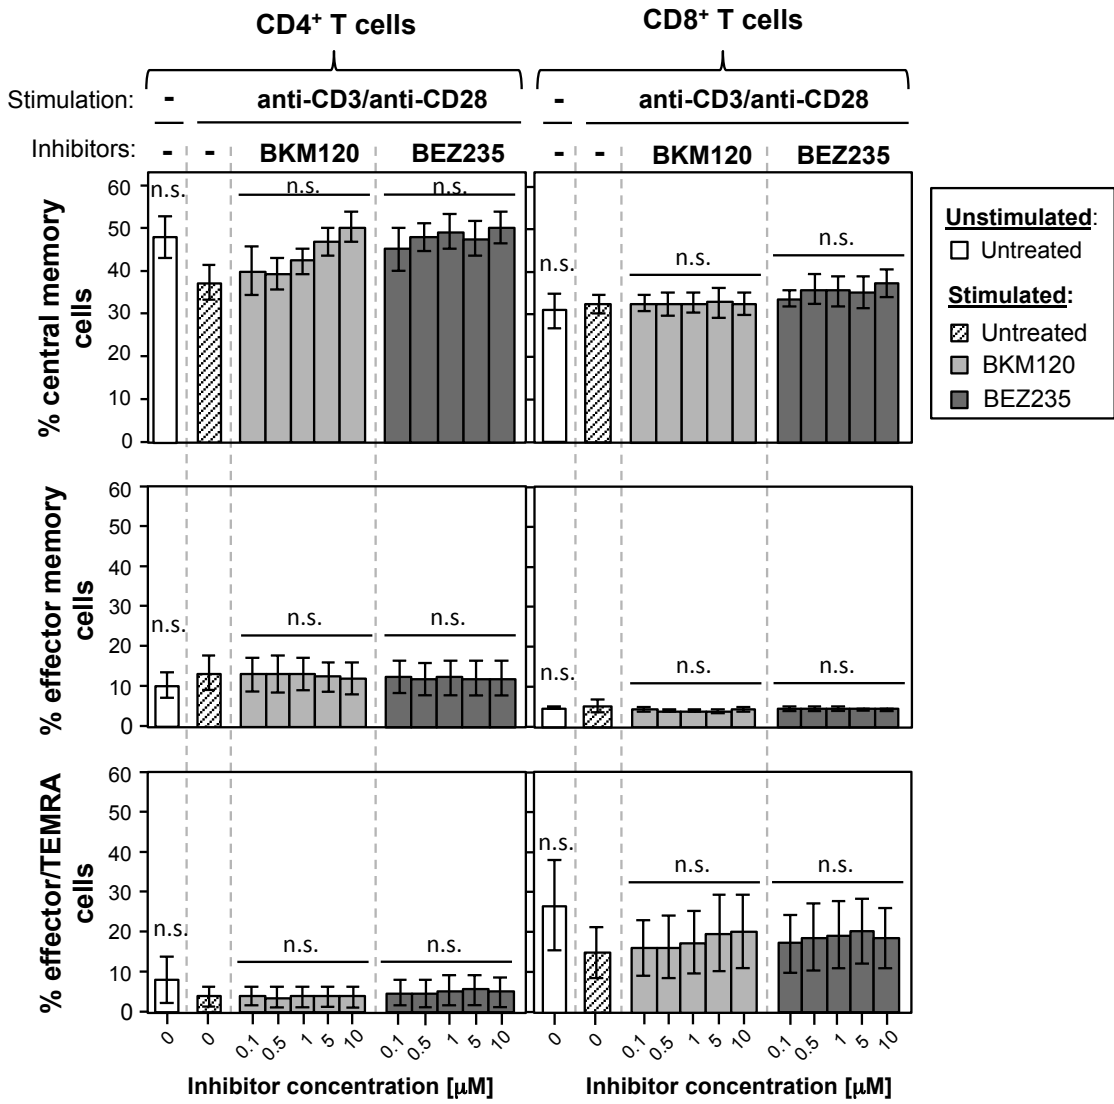

Figure S2.

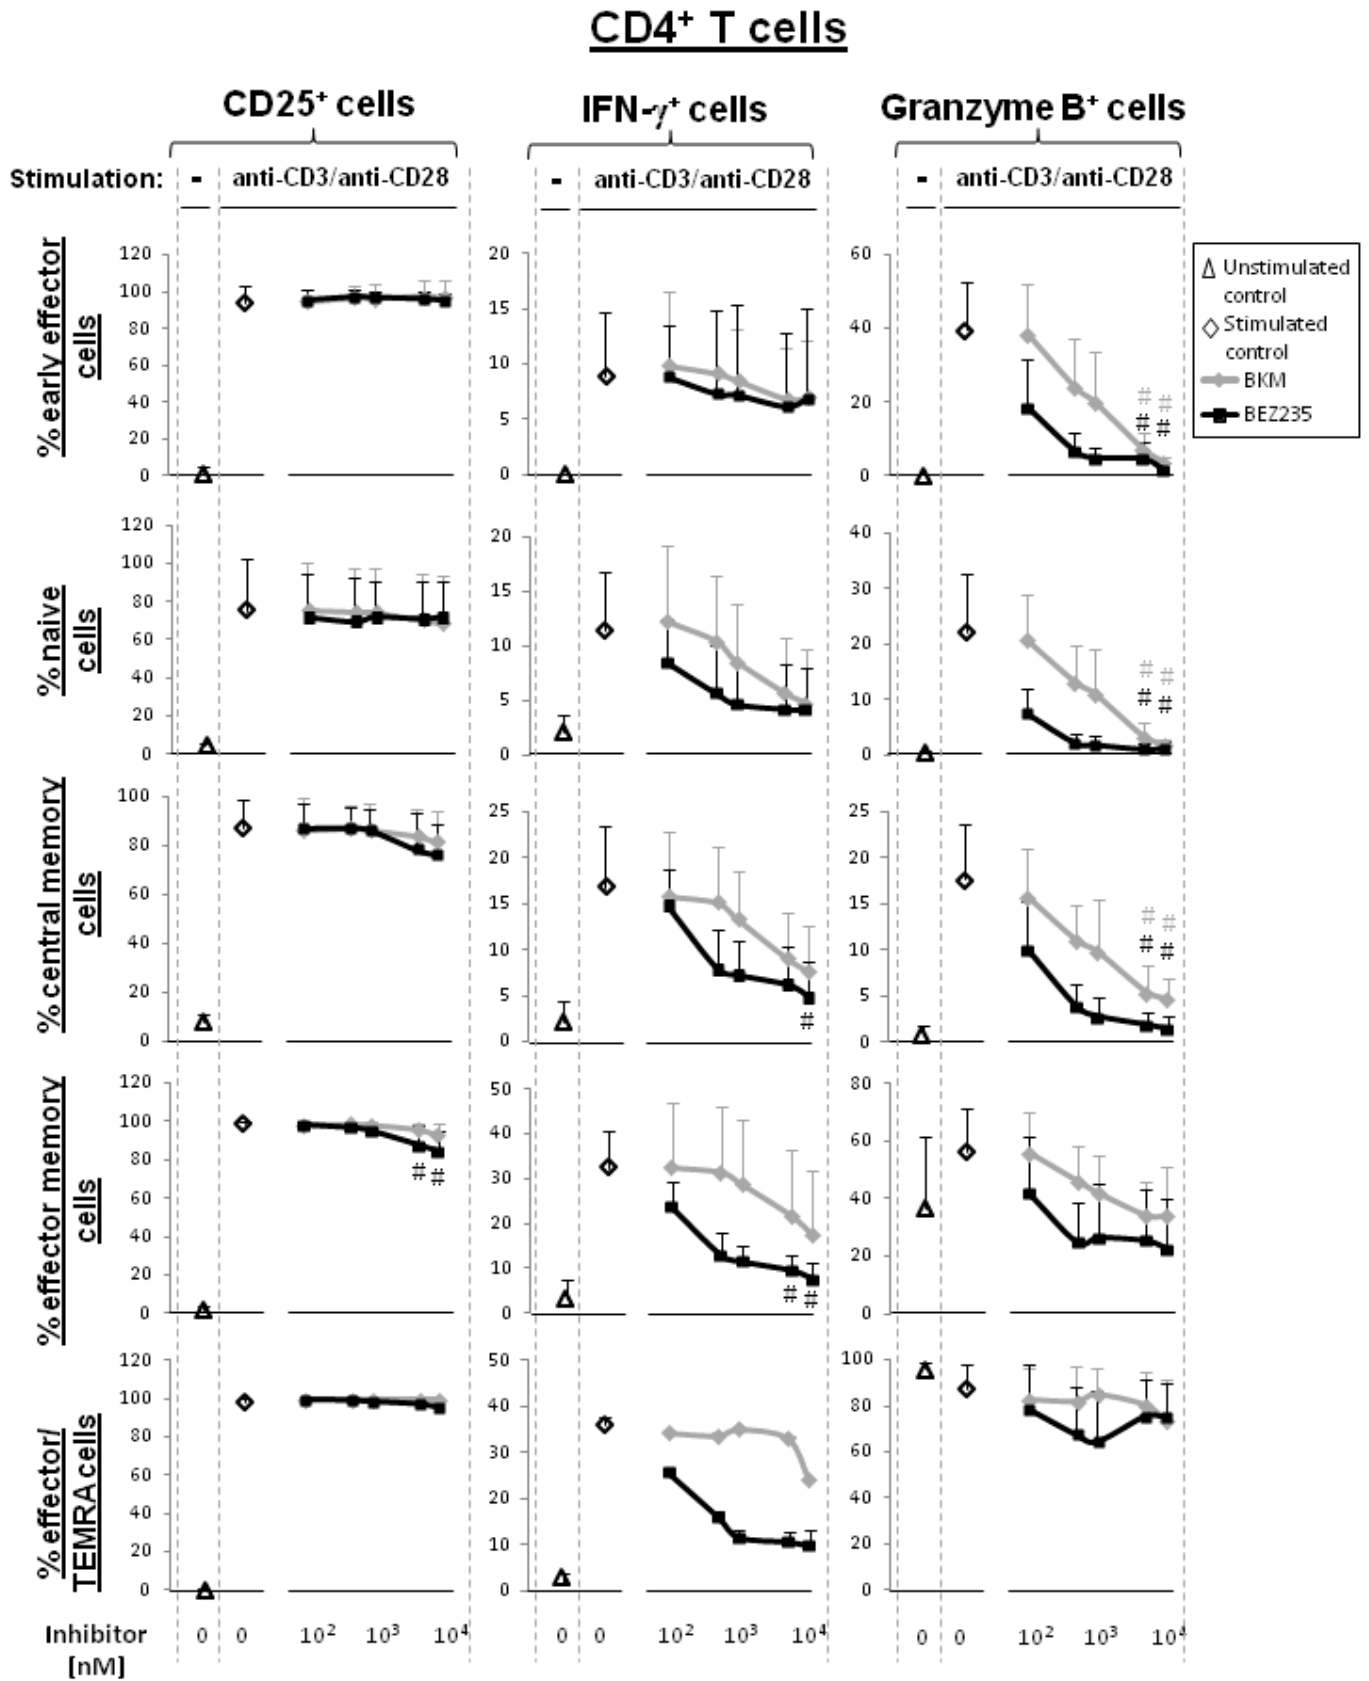

Figure S3.

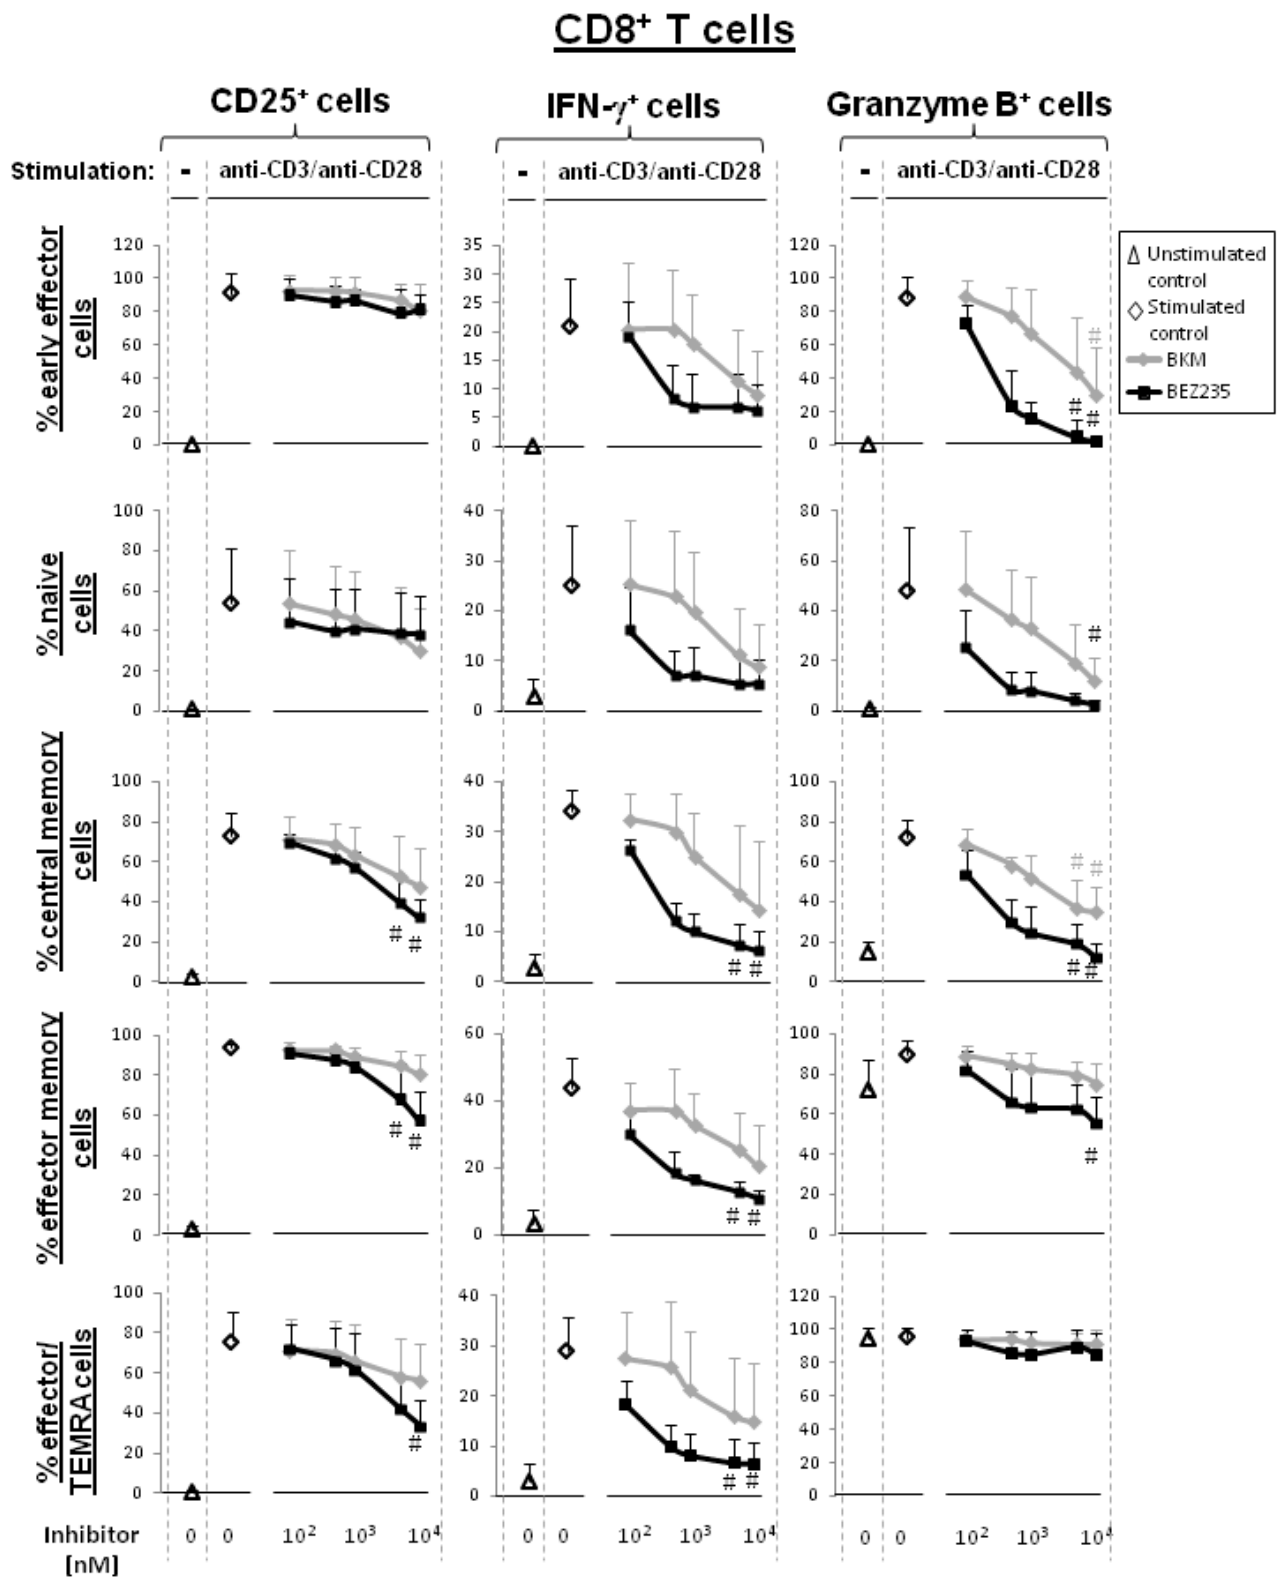

FIGURE S4.

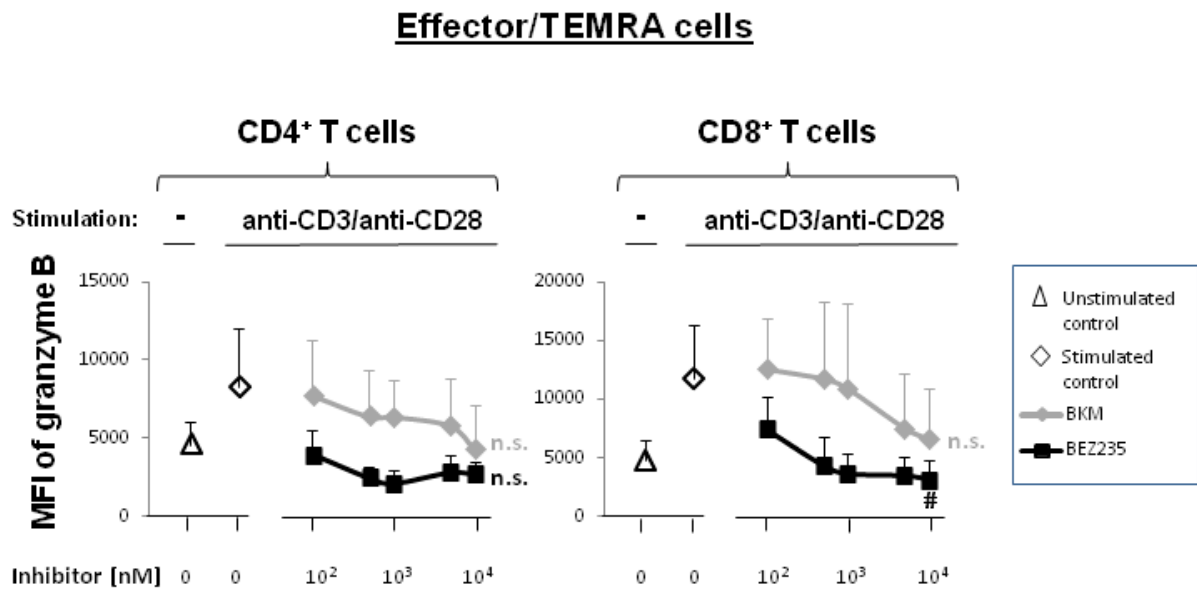

Supplement: MOESM1 [file 10918244]
